# Supplementary material for: InP/ZnS–graphene oxide and reduced graphene oxide nanocomposites as fascinating materials for potential optoelectronic applications
Source: Royal Society of Chemistry journal article supplement (doi:10.1039/c3nr02333h), 2013-01-01
Supplement: c3nr02333h.pdf [file c3nr02333h.pdf]

## Electronic Supplementary Information

### InP/ZnS-Graphene Oxide and Reduced Graphene Oxide Nanocomposites as Fascinating Materials for Potential Optoelectronic Applications †

Monica Samal,<sup>a</sup> Priyaranjan Mohapatra,<sup>b</sup> Ramesh Subbiah,<sup>c</sup> Chang-Lyoul Lee,<sup>d</sup> Benayad Anass,<sup>e</sup> Jang Ah Kim,<sup>f</sup> Taesung Kim,<sup>f</sup> and Dong Kee Yi<sup>g,\*</sup>

<sup>a</sup>*Department of Bionano Technology, GBRI, Gachon Bionano Institute, Gachon University, Seongnam 460-701, South Korea*

<sup>b</sup>*Department of Chemistry, Veer Surendra Sai University of Technology, Burla 768018, India*

<sup>c</sup>*Center for Biomaterials, Korea Institute of Science and Technology (KIST), Seoul 136-791, South Korea*

<sup>d</sup>*Advanced Photonics Research Institute (APRI), Gwangju Institute of Science and Technology (GIST), Gwangju 500-712, South Korea*

<sup>e</sup>*Samsung Advanced Institute of Technology, Yongin 446-712, South Korea*

<sup>f</sup>*SKKU Advanced Institute of NanoTechnology, Department of Mechanical Engineering, Sungkyunkwan University, Suwon 440-746, South Korea*

<sup>g</sup>*Department of Chemistry, Myongji University, Yongin 449-728, South Korea*

*\*Corresponding Author E-mail: dongkeeyi@gmail.com*

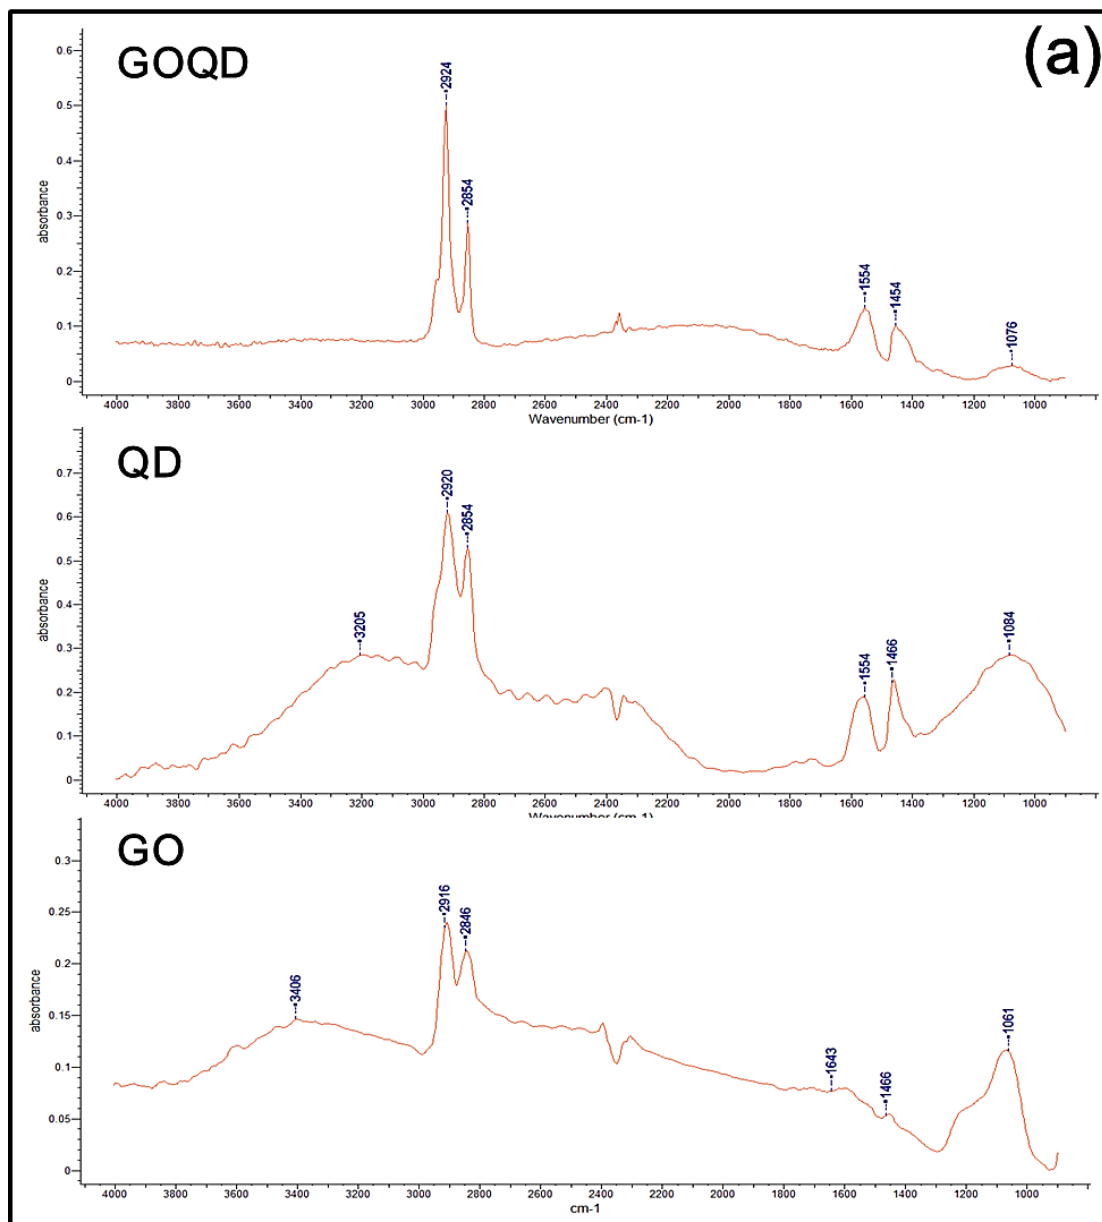

**Fig. S1a** Micro-FTIR data of GO, QD and GOQD.

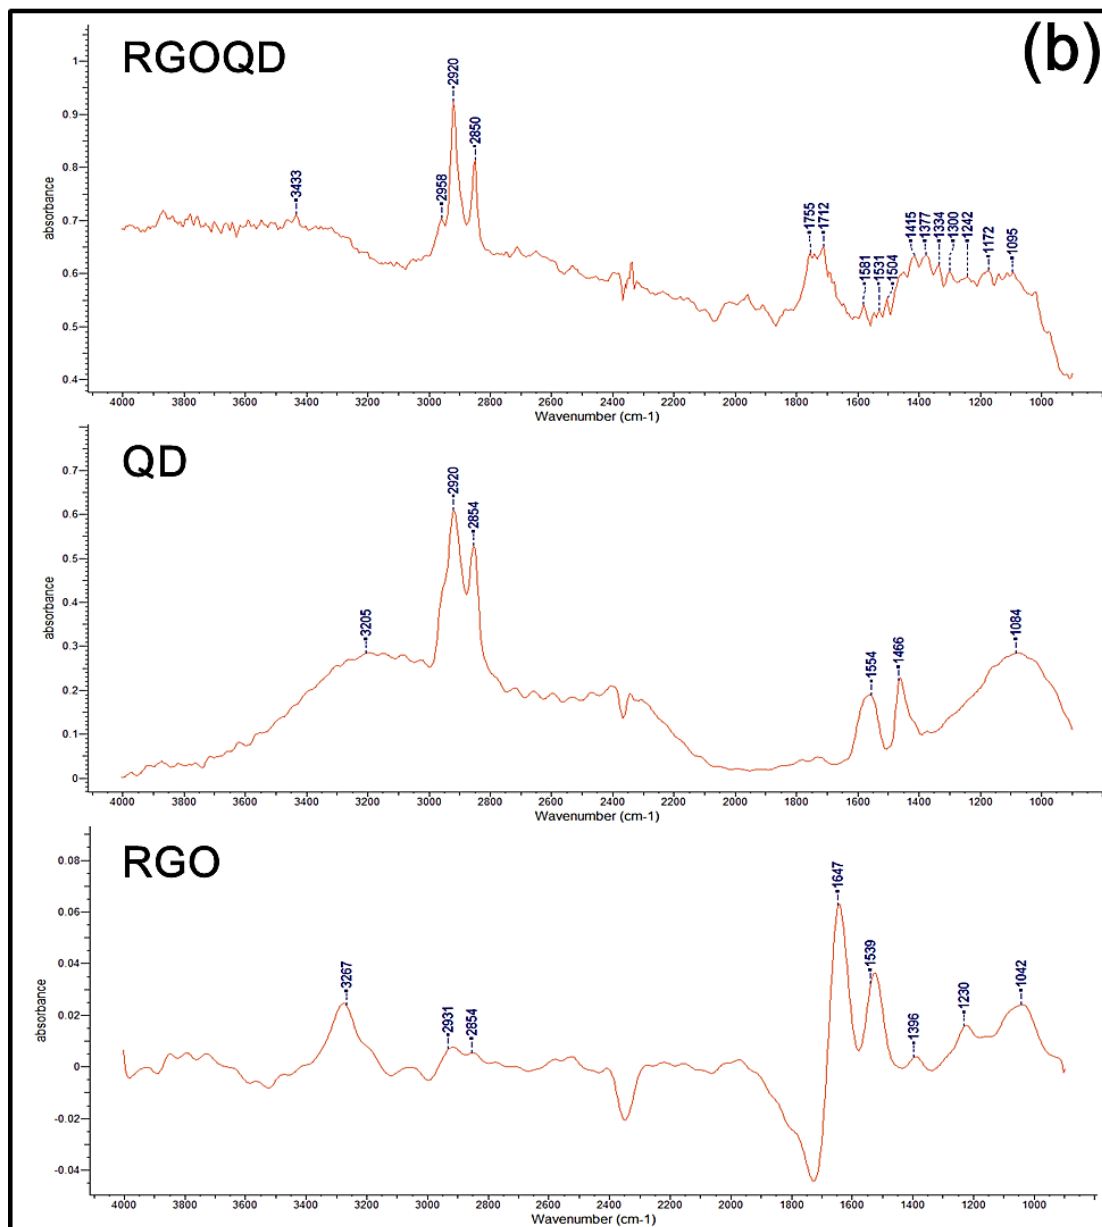

**Fig. S1b** Micro-FTIR data of RGO, QD and RGOQD.

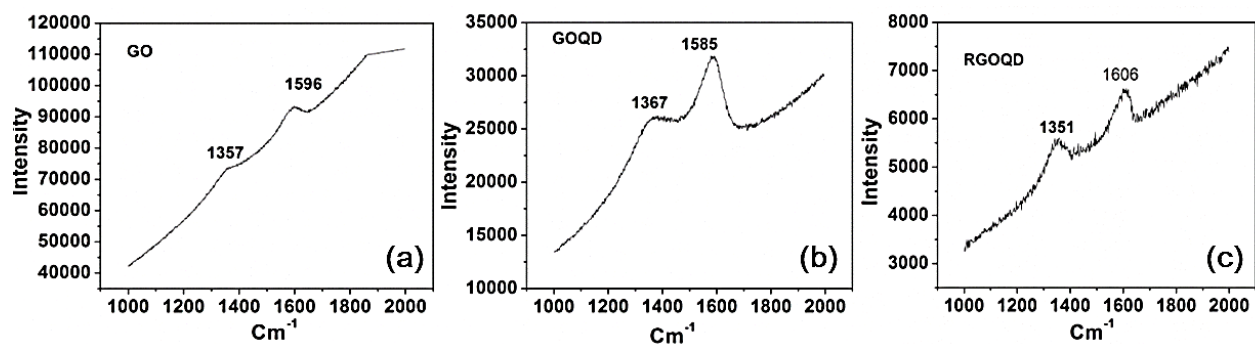

**Fig. S2** RAMAN spectra of (a) GO, (b) GOQD and (c) RGOQD.

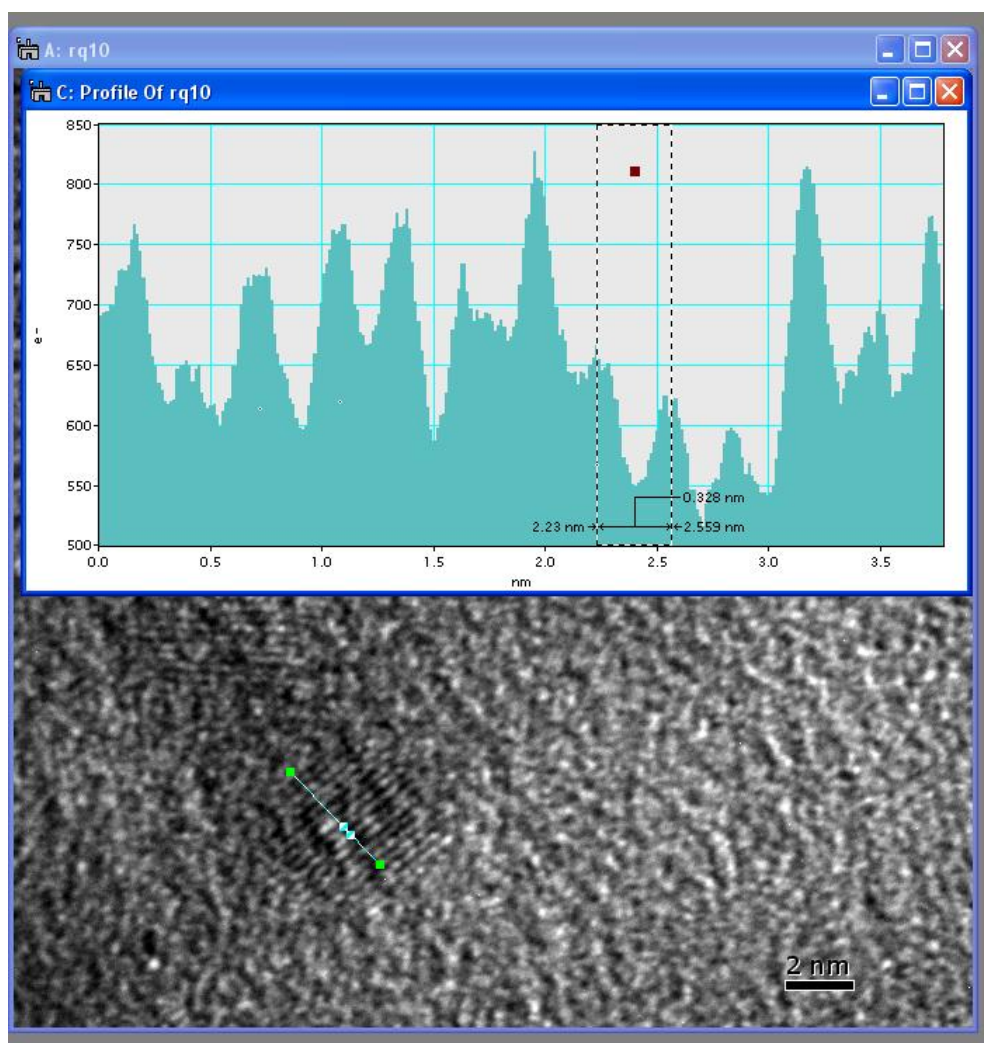

**Fig. S3** Lattice separation image of RGOQD.

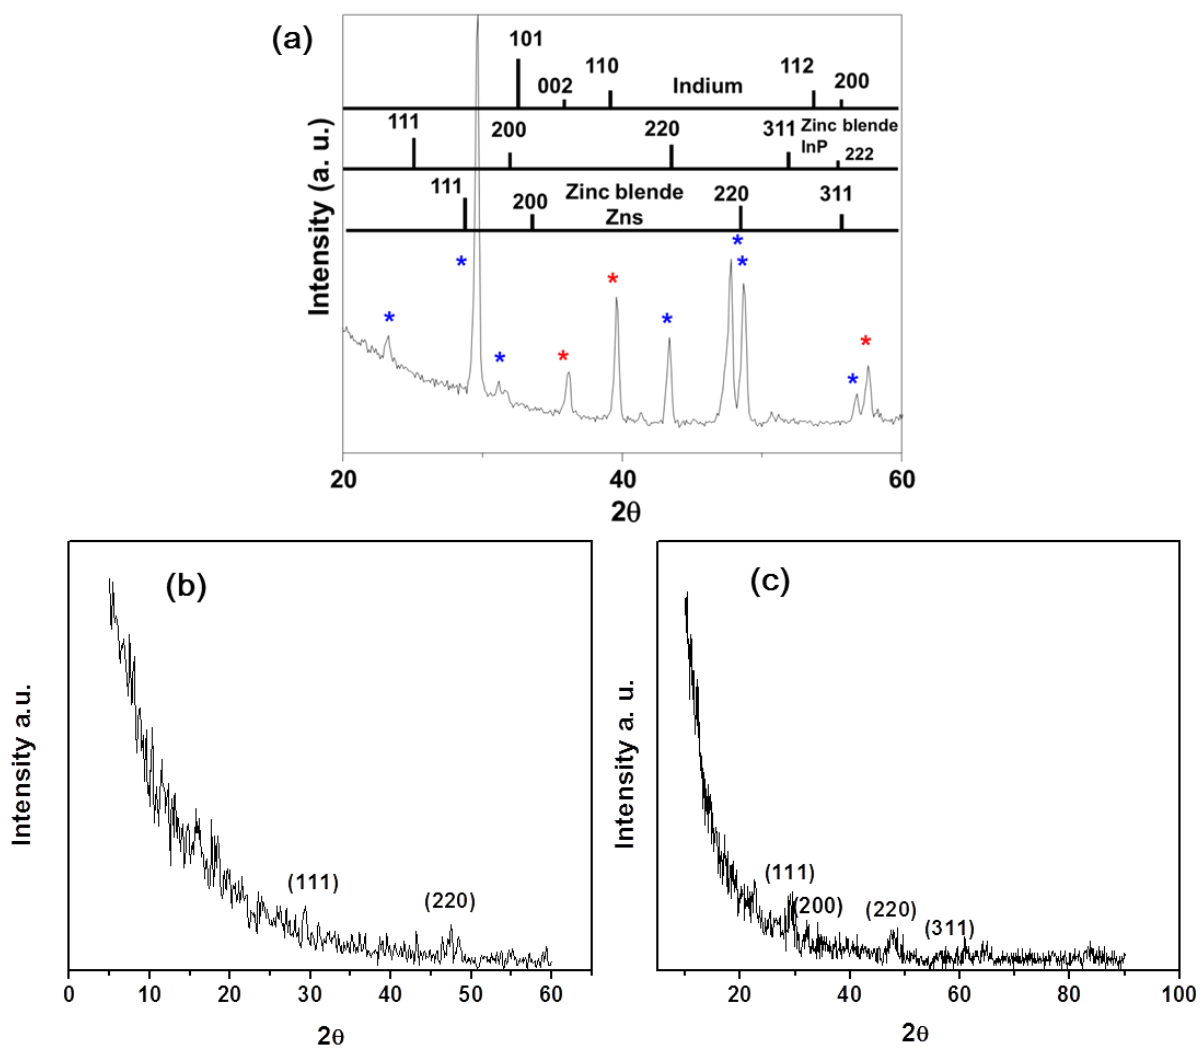

**Fig. S4** a) XRD spectra of dried core/shell QD. The blue stars indicate the peaks corresponding to QD and red stars indicate the peaks corresponding to indium, (b) XRD spectra of dried GOQD. The (111) and (220) peaks appear at values of  $29.1^\circ$  and  $47.6^\circ$ , respectively, (c) XRD spectra of dried RGOQD. The (111), (200), (220) and (311) peaks appear at values of  $29.1^\circ$ ,  $32^\circ$ ,  $47^\circ$  and  $56.6^\circ$ , respectively.

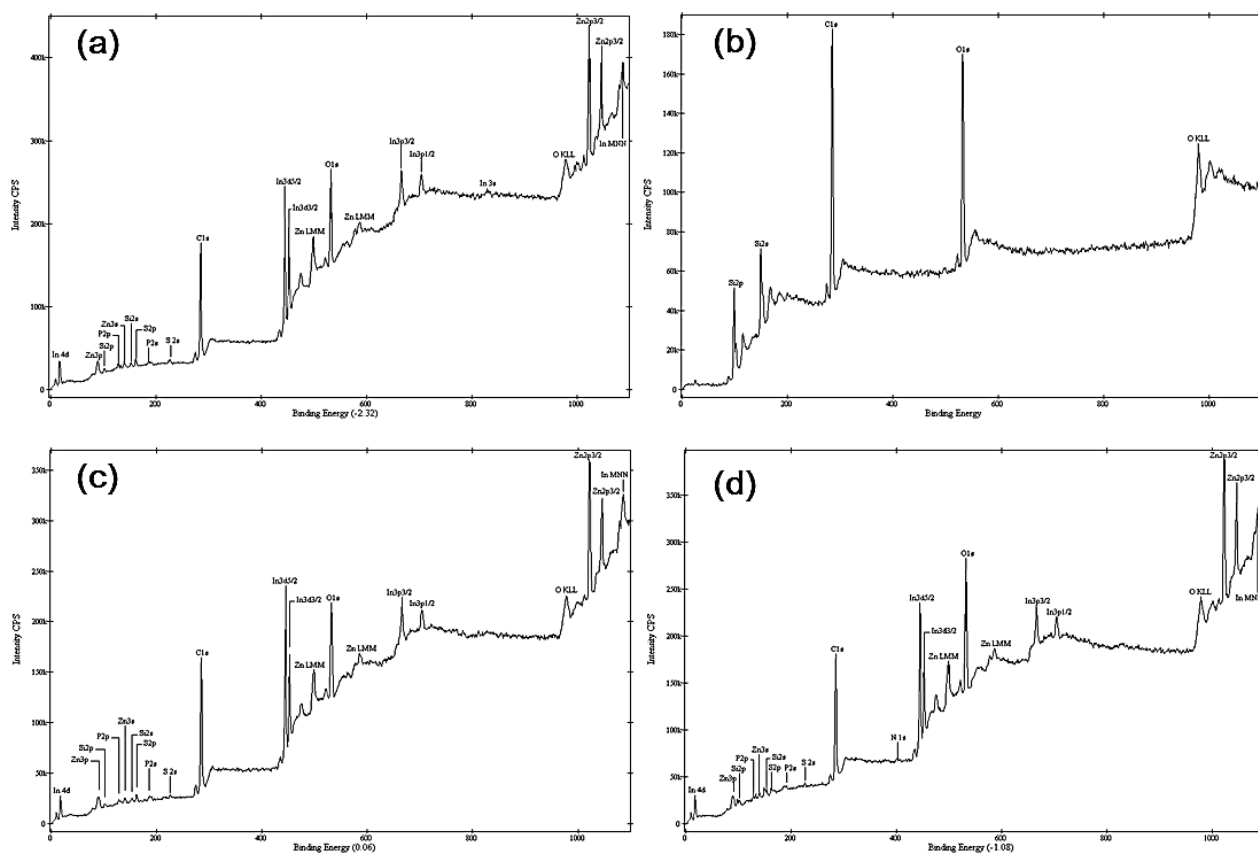

**Fig. S5** XPS spectra of (a) QD, (b) RGO, (c) GOQD, and (d) RGOQD.

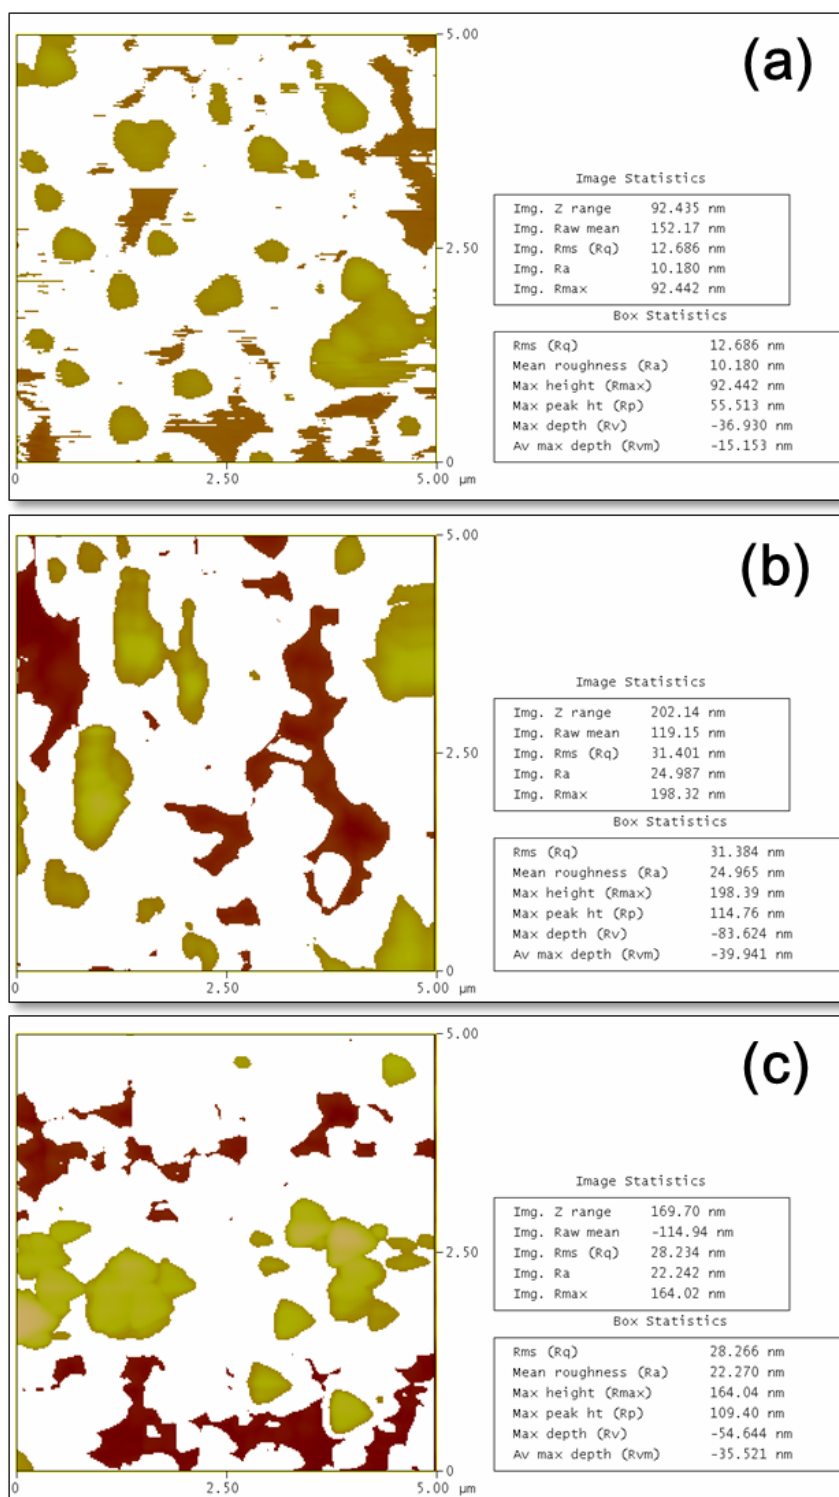

**Fig. S6** AFM roughness images of (a) QD, (b) GOQD, and (c) RGOQD.

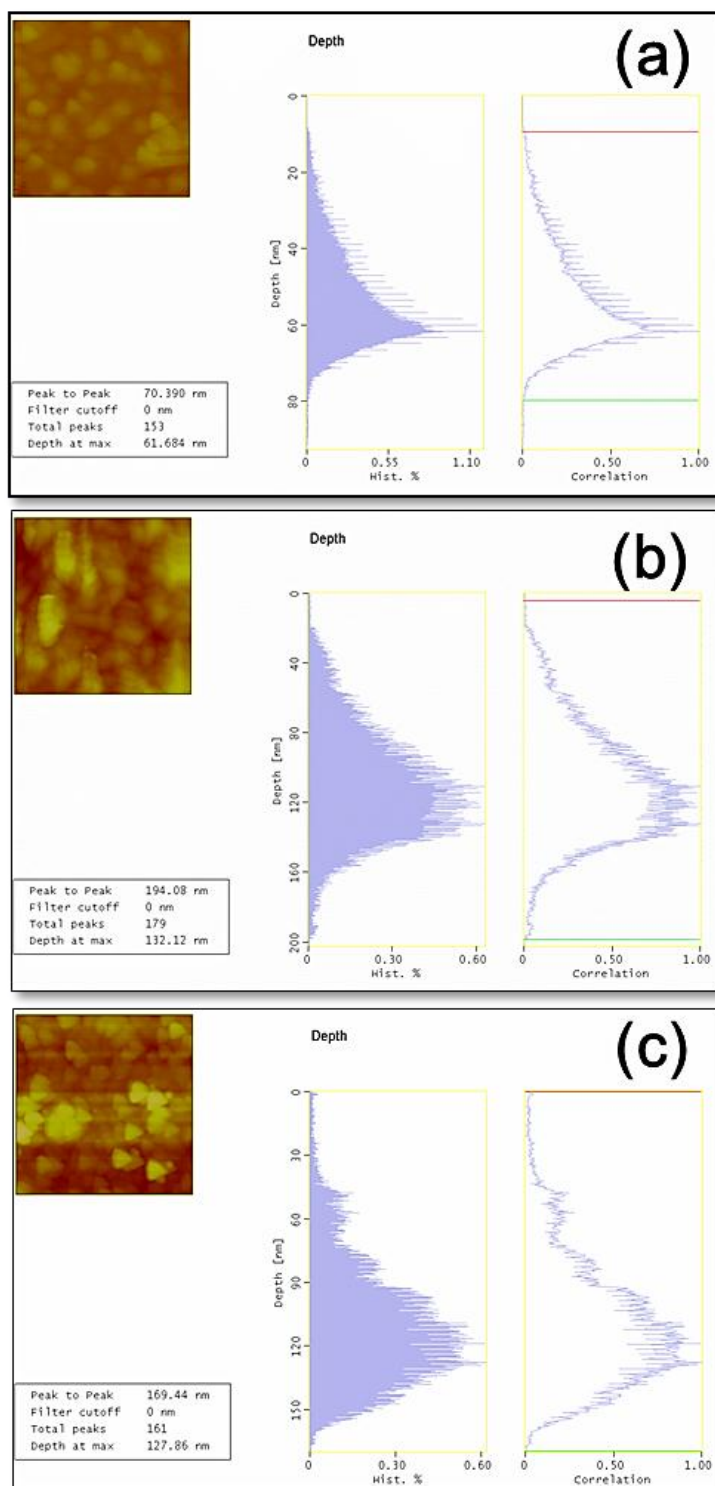

**Fig. S7** AFM depth analysis images of (a) QD, (b) GOQD, and (c) RGOQD.



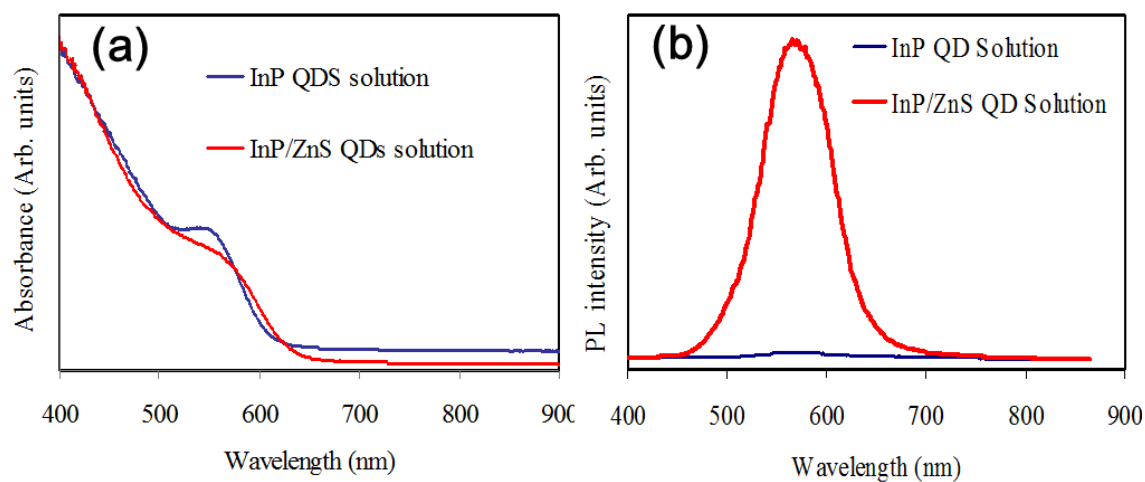

**Fig. S8** (a) UV, (b) PL plots of InP and InP/ZnS QD.

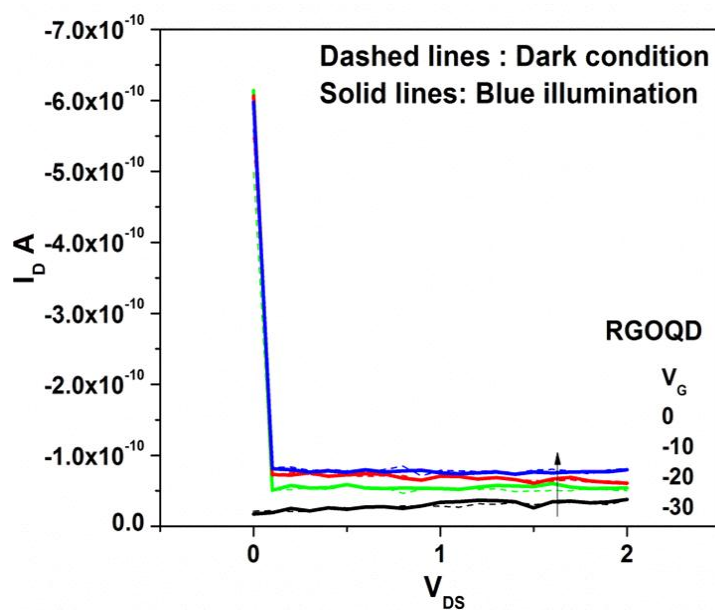

**Fig. S9**  $I_{DS}$  vs.  $V_{DS}$  plot of the MOSFET consisting of GOQD with Y-axis range inverted.

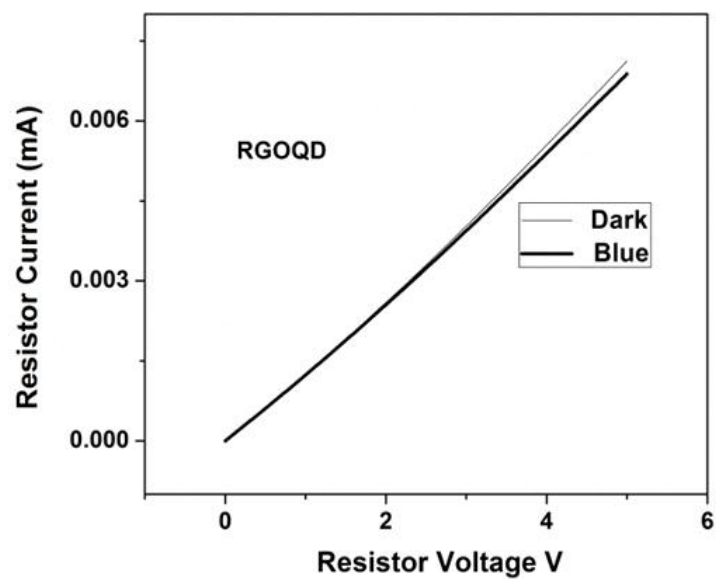

**Fig. S10** Resistor current vs. voltage plot of the MOSFET consisting of RGOQD.

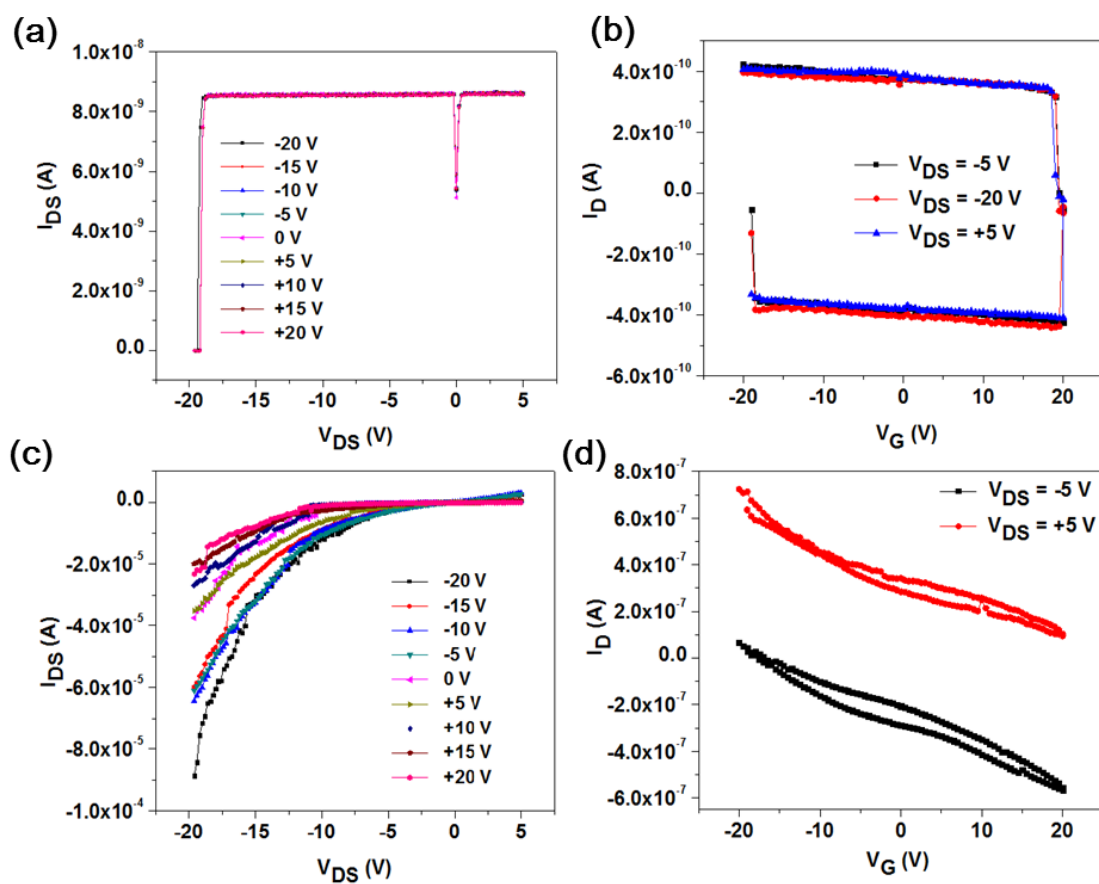

**Figure S11.** (a) output curves of GO, (b) transfer curves of GO, (c) output curves of RGO, (d) transfer curves of RGO.

**Table S1.** Elemental ratios and peak positions for the elements found from XPS of QD, GOQD and RGOQD.

| Elemental Ratio | QD                  | GOQD                | RGOQD               |
|-----------------|---------------------|---------------------|---------------------|
| In:Zn           | (32.1/28.756) 1.11  | (4.892/3.688) 1.326 | (4.882/3.938) 1.239 |
| In:P            | (32.1/16.552) 1.94  | (4.892/1.723) 2.84  | (4.882/1.882) 2.594 |
| In-P-S          | (32.1/6.66) 4.82    | (4.892/1.186) 4.124 | (4.882/2.203) 2.216 |
| Zn-S            | (28.756/15.931)1.80 | (3.688/1.449) 2.545 | (3.938/1.273) 3.09  |
| Peak position   | QD                  | GOQD                | RGOQD               |
| In3d5/2         | 444.46              | 444.611             | 444.834             |
| In3d3/2         | 452.04              | 452.196             | 452. 42             |
| Zn3p3/2         | 1022.15             | 1022.149            | 1022.312            |
| Zn3p1/2         | 1045.20             | 1045.232            | 1045.385            |
| S               | 162.13              | 161.9               | 161.9               |
| P (In-P)        | 128.66              | 128.6               | 128.7               |
| P (In-P-S)      | 132.2               | 132.8               | 133.1               |

**Table S2.** Data from AFM profiles.

| Entry | RMS roughness from dual section analysis <sup>a</sup> nm | Layer height from dual section analysis <sup>b</sup> (nm) | RMS roughness of entire 5 $\mu\text{m}^2$ films <sup>c</sup> (nm) | Depth and (peak to peak distance) <sup>d</sup> (nm) |
|-------|----------------------------------------------------------|-----------------------------------------------------------|-------------------------------------------------------------------|-----------------------------------------------------|
| QD    | 16.32                                                    | 5.23                                                      | 2.68                                                              | 61.68 (70.19)                                       |
| GOQD  | 37.50                                                    | 117.67                                                    | 31.38                                                             | 132.12 (194.08)                                     |
| RGOQD | 28.48                                                    | 72.87                                                     | 28.26                                                             | 127.86 (169.44)                                     |

Data from <sup>a,b</sup> Figure 4, <sup>c</sup> Figure S6, and <sup>d</sup> Figure S7.
